# Supplementary material for: Quantitative interaction screen of telomeric repeat-containing RNA reveals novel TERRA regulators
Source: HighWire-hosted journal article supplement (doi:10.1101/gr.151878.112), 2013-08-06
Supplement: Supplemental_Figure_Table_Legends.docx [file Supplemental_Figure_Table_Legends.docx]

**Suppl. Figure 1**

Verification of esiRNA knock-down efficiencies by quantitative PCR 24 hours post transfection. Individual mRNA levels were normalized against GAPDH for housekeeping and are displayed relative to the levels seen in the RLuc esiRNA transfection control set to 1. Average values of three technical replicates are shown and error bars represent one standard deviation.

**Suppl. Figure 2**

Profiles of cell cycle FACS analysis.

**Suppl. Table 1**

Overview of mass spectrometric results of all proteins identified in the screen.

**Suppl. Table 2**

List of cDNA sequences for the used esiRNA and the primers used in this study.
