# Supplementary material for: Quantitative interaction screen of telomeric repeat-containing RNA reveals novel TERRA regulators
Source: HighWire-hosted journal article supplement (doi:10.1101/gr.151878.112), 2013-08-06
Supplement: Supplemental_Table2.xlsx [file Supplemental_Table2.xlsx]

## Sheet: Sheet1
esiRNA target sequences and corresponding qPCR primers
	gene name	ENSEMBL ID	qPCR forward primer (5' --> 3')	qPCR reverse primer (5' --> 3')	esiRNA cDNA target sequence
	RLuc				GATAACTGGTCCGCAGTGGTGGGCCAGATGTAAACAAATGAATGTTCTTGATTCATTTATTAATTATTATGATTCAGAAAAACATGCAGAAAATGCTGTTATTTTTTTACATGGTAACGCGGCCTCTTCTTATTTATGGCGACATGTTGTGCCACATATTGAGCCAGTAGCGCGGTGTATTATACCAGACCTTATTGGTATGGGCAAATCAGGCAAATCTGGTAATGGTTCTTATAGGTTACTTGATCATTACAAATATCTTACTGCATGGTTTGAACTTCTTAATTTACCAAAGAAGATCATTTTTGTCGGCCATGATTGGGGTGCTTGTTTGGCATTTCATTATAGCTATGAGCATCAAGATAAGATCAAAGCAATAGTTCACGCTGAAAGTGTAGT…
	ARID1A	ENSG00000117713	CAGAGAGCACATGGGCATTA	ATCAGGCATCGTCGGAAATA	CCCTCAAGTCTGGTCTCCTGGCAGAGAGCACATGGGCATTAGATACCATCAACATCCTGCTGTATGATGACAACAGCATCATGACCTTCAACCTCAGTCAGCTCCCAGGGTTGCTAGAGCTCCTTGTAGAATATTTCCGACGATGCCTGATTGAGATCTTTGGCATTTTAAAGGAGTATGAGGTGGGTGACCCAGGACAGAGAACGCTACTGGATCCTGGGAGGTTCAGCAAGGTGTCTAGTCCAGCTCCCATGGAGGGTGGGGAAGAAGAAGAAGAACTTCTAGGTCCTAAACTAGAAGAGGAAGAAGAAGAGGAAGTAGTTGAAAATGATGAGGAGATAGCCTTTTCAGGCAAGGACAAGCCAGCTTCAGAGAATAGTGAGGAGAAGCTGATCAGTA…
	INIP	ENSG00000148153	TTTGTCCAGTTCTGCCAAGA	CCAATTGCCACTGGACATAC	TCATCCTGGAGCTAGCATTGCACTCTCGAGACCCTCTCTTAATAAGGACTTCCGGGATCACGCTGAGCAGCAGCATATTGCAGCCCAACAGAAGGCAGCTTTGCAGCATGCTCATGCACATTCATCTGGATACTTCATCACTCAAGACTCTGCATTTGGGAACCTTATTCTTCCTGTTTTACCTCGCCTTGACCCAGAATGAAGAAAACATTTGCGATGGAAAAGTGACTTTGTAATATCAAATGCCAAAGCTACTATCATTCAGTGCTACATGAACTGTGACTTTAAGAATTTTGGTGAACTTTGATATTTTTTGTTTGTCTGAAAGAAAGGAATGTGTAAGTGAAAGCTGAAAGAAGAATAACCAGGATGATGAGAGCTGTGGAAGCTGTATCGTCCA
	DBT	ENSG00000137992	TCATCATGAGACACTGCAGGA	CCTATGTGGGGAAGCCATTA	AAAACCCATTGCATTTGCTCGTGGAATTAAACTCTCCTTTATGCCTTTCTTCTTAAAGGCTGCTTCCTTGGGATTACTACAGTTTCCTATCCTTAACGCTTCTGTGGATGAAAACTGCCAGAATATAACATATAAGGCTTCTCATAACATTGGGATAGCAATGGATACTGAGCAGGGTTTGATTGTCCCTAATGTGAAAAATGTTCAGATCTGCTCTATATTTGACATCGCCACTGAACTGAACCGCCTCCAGAAATTGGGCTCTGTGAGTCAGCTCAGCACCACTGATCTTACAGGAGGAACATTTACTCTTTCCAACATTGGATCAATTGGTGGTACCTTTGCCAAACCAGTGATAATGCCACCTGAAGTAGCCATTGGGGCCCTTGGATCAATTAA…
	GRSF1	ENSG00000132463	TTCATTCCTTCTGCTTGGAAA	AGAACCAGAAATGGCCAACC	TGGAGTCAGAGCAGGATGTGCAGAAAGCCTTAGAGAAGCACCGCATGTACATGGGCCAGCGGTATGTGGAAGTATATGAGATAAACAATGAAGATGTGGATGCCTTAATGAAGAGCTTGCAGGTCAAATCTTCGCCTGTGGTAAATGATGGTGTGGTTCGTTTGAGAGGACTTCCTTATAGTTGCAATGAGAAAGACATTGTAGACTTCTTTGCAGGACTGAATATAGTTGACATTACTTTTGTGATGGACTATAGAGGGAGGCGAAAAACAGGGGAAGCCTATGTGCAATTTGAAGAACCAGAAATGGCCAACCAAGCCCTGTTGAAACACAGGGAAGAAATTGGTAATCGATACATCGAGATATTTCCAAGCAGAAGGAATGAAGTTCGAACACATG…
	HMGA1	ENSG00000137309	CCAAAGGGAAGCAAAAACAA	GAGATGCCCTCCTCTTCCTC	CCCAGCCAAACTGTCTTTGTCACCACGTGGGGCTCACTTTTCATCCTTCCCCAACTTCCCTAGTCCCCGTACTAGGTTGGACAGCCCCCTTCGGTTACAGGAAGGCAGGAGGGGTGAGTCCCCTACTCCCTCTTCACTGTGGCCACAGCCCCCTTGCCCTCCGCCTGGGATCTGAGTACATATTGTGGTGATGGAGATGCAGTCACTTATTGTCCAGGTGAGGCCCAAGAGCCCTGTGGCCGCCACCTGAGGTGGGCTGGGGCTGCTCCCCTAACCCTACTTTGCTTCCGCCACTCAGCCATTTCCCCCTCCTCAGATGGGGCACCAATAACAAGGAGCTCACCCTGCCCGCTCCCAACCCCCCTCCTGCTCCTCCCTGCCCCCCAAGGTTCTGGTTCC…
	HMGB1	ENSG00000189403	AGGATCTCCTTTGCCCATGT	TGAGCTCCATAGAGACAGCG	CACACCCTGCATATCATAATGGGGGTAAAGTTAAGTTGAGATAGTTTTCATCCATAACTGAACATCCAAAATCTTGATCAGTTAAGAAATTTCACATAGCCCACTTACATTTACAAACTGAAGAGTAATCAATCTACTCAAAGCATGGGATTATTAGAATCAAACATTTTGAAAGTCTGTCCTTGAAGGACTAATAGAAAAGTATGTTCTAACCTTTACATGAGGACTCTATTCTTTAACTCCCATTACCATGTAATGGCAGTTATATTTTGCAGTTCCCACATTAAAGAAGACCTGAGAATGTATCCCCAAAAGCGTGAGCTTAAAATACAAGACTGCCATATTAAATTTTTTGTTGACATTAGTCTCAGTGAAGACTATGAAAATGCTGGCTATAGA…
	HMGB2	ENSG00000164104	AGGCGTACGAGGACATTTTG	CTCTGAGGAAAAGCTCGCAC	TTACGTTCCTCCCAAAGGTGATAAGAAGGGGAAGAAAAAGGACCCCAATGCTCCTAAAAGGCCACCATCTGCCTTCTTCCTGTTTTGCTCTGAACATCGCCCAAAGATCAAAAGTGAACACCCTGGCCTATCCATTGGGGATACTGCAAAGAAATTGGGTGAAATGTGGTCTGAGCAGTCAGCCAAAGATAAACAACCATATGAACAGAAAGCAGCTAAGCTAAAGGAGAAATATGAAAAGGATATTGCTGCATATCGTGCCAAGGGCAAAAGTGAAGCAGGAAAGAAGGGCCCTGGCAGGCCAACAGGCTCAAAGAAGAAGAACGAACCAGAAGATGAGGAGGAGGAGGAGGAAGAAGAAGATGAAGATGAGGAGGAAGAGGATGAAGATGAAGAATA…
	hnRNPA1	ENSG00000135486	TCAACCCTCCAATGAAGAGC	GCCGAAGAAGCATCGTTAAA	AAAGCCCTGTCAAAGCAAGAGATGGCTAGTGCTTCATCCAGCCAAAGAGGTCGAAGTGGTTCTGGAAACTTTGGTGGTGGTCGTGGAGGTGGTTTCGGTGGGAATGACAACTTCGGTCGTGGAGGAAACTTCAGTGGTCGTGGTGGCTTTGGTGGCAGCCGTGGTGGTGGTGGATATGGTGGCAGTGGGGATGGCTATAATGGATTTGGTAATGATGGTGGTTATGGAGGAGGCGGCCCTGGTTACTCTGGAGGAAGCAGAGGCTATGGAAGTGGTGGACAGGGTTATGGAAACCAGGGCAGTGGCTATGGCGGGAGTGGCAGCTATGACAGCTATAACAACGGAGGCGGAGGCGGCTTTGGCGGTGGTAGTGGTAGCAATTTTGGAGGTGGTGGAAGC…
	hnRNPM	ENSG00000099783	TTCTCATTCTGAGCAGGTCG	CAAAATGGAGGAAGAGAGCG	GCTGGAAGACTTGGAAGCACAGTATTTGTAGCAAATCTGGATTATAAAGTTGGCTGGAAGAAACTGAAGGAAGTATTTAGTATGGCTGGTGTGGTGGTCCGAGCAGACATTCTTGAAGATAAAGATGGAAAAAGTCGTGGAATAGGCACTGTTACTTTTGAACAGTCCATTGAAGCTGTGCAAGCTATATCTATGTTCAATGGCCAGCTGCTATTTGATAGACCAATGCACGTCAAGATGGATGAGAGGGCCTT
	MORF4L2	ENSG00000123562	AAGGGTGAAGTGGGAGATACAA	TTGCAGAACCTTCCCTGATT	TTGAAAGTGAGGAGGCGTTTAAGAATAGAATGGAGGTTAAAGTGAAGATTCCTGAAGAATTAAAACCATGGCTTGTTGAGGACTGGGACTTAGTTACCAGGCAGAAGCAGCTGTTTCAACTCCCTGCCAAGAAAAATGTAGATGCAATTCTGGAGGAGTATGCAAATTGCAAGAAATCGCAGGGAAATGTTGATAATAAGGAATATGCGGTTAATGAAGTTGTGGCAGGAATAAAAGAATATTTCAATGTGATGTTGGGCACTCAGCTGCTCTACAAATTTGAGAGGCCCCAGTATGCTGAAATCCTCTTGGCTCACCCTGATGCTCCAATGTCCCAGGTTTATGGAGCACCACACCTACTGAGATTATTTGTAAGAATTGGAGCAATGTTGGCCTATA…
	PC	ENSG00000173599			GCAGCTATGTACCCCGATGTGTTTGCCCACTTCAAGGACTTCACTGCCACCTTTGGCCCCCTGGATAGCCTGAATACTCGCCTCTTCCTGCAGGGACCCAAGATCGCAGAGGAGTTTGAGGTGGAGCTGGAGCGGGGCAAGACGCTGCACATCAAAGCCCTGGCCGTGAGCGACCTGAACCGGGCCGGCCAGAGGCAGGTCTTCTTTGAGCTCAATGGGCAGCTGCGGTCCATCTTGGTCAAGGACACCCAGGCCATGAAGGAGATGCACTTCCACCCCAAGGCCCTAAAGGACGTGAAGGGCCAGATCGGGGCGCCCATGCCTGGGAAGGTGATAGACATCAAAGTGGTGGCAGGGGCCAAGGTGGCCAAGGGCCAGCCCCTGTGTGTGCTCAGTGCC…
	PSIP1	ENSG00000164985	TGGTTTGCCATACTTTTCCTT	CACCCACAAACAAACTACCCA	TCTTCGCCAAGATGAAAGGTTATCCCCATTGGCCAGCTCGAGTAGACGAAGTTCCTGATGGAGCTGTAAAGCCACCCACAAACAAACTACCCATTTTCTTTTTTGGAACTCATGAGACTGCTTTTTTAGGACCAAAGGATATATTTCCTTACTCAGAAAATAAGGAAAAGTATGGCAAACCAAATAAAAGAAAAGGTTTTAATGAAGGTTTATGGGAGATAGATAACAATCCAAAAGTGAAATTTTCAAGTCAACAGGCAGCAACTAAACAATCAAATGCATCATCTGATGTTGAAGTTGAAGAAAAGGAAACTAGTGTTTCAAAGGAAGATACCGACCATGAAGAAAAAGCCAGCAATGAGGATGTGACTAAAGCAGTTGACATAACTACTCCAAAAG…
	RCC2	ENSG00000179051	GTGGGAAGAGCAGCATCATT	GAAGACTTGGGCTTGTGGTC	CAGCTGGGACACAACTCAGATGGGAAGTTCATCGCCCGGGCACAGCGGATAGAGTACGACTGTGAACTAGTTCCCCGGCGAGTGGCCATCTTCATTGAGAAGACGAAAGATGGACAGATTCTGCCTGTACCAAACGTGGTTGTACGAGACGTGGCCTGTGGCGCTAACCACACGCTGGTCCTGGACTCCCAGAAGCGAGTCTTCTCCTGGGGCTTTGGTGGCTATGGCCGGCTGGGCCACGCAGAGCAGAAGGATGAGATGGTCCCCCGCCTGGTGAAGCTGTTTGACTTCCCTGGGCGTGGGGCTTCCCAGATCTATGCTGGTTACACCTGCTCCTTTGCTGTCAGTGAAGTGGGTGGTCTGTTTTTCTGGGGGGCCACCAACACCTCCCGTGAATCT…
	SRRT	ENSG00000087087	CGATATTCACCCCGACTACG	CCGCGAGAGAGATGAAAGAC	GCAGAGATTGACCTGGGTGTGCCGCCGCCCGTGATGAAGACCTTCAAGGAGTTTCTCCTCTCCCTGGATGACTCGGTGGATGAGACGGAGGCCGTCAAGCGCTATAATGACTACAAGCTGGATTTCCGGAGGCAACAGATGCAGGATTTCTTCCTGGCGCACAAAGATGAGGAGTGGTTTCGGTCTAAGTACCACCCAGATGAGGTGGGGAAGCGTCGGCAGGAGGCCCGGGGGGCCCTGCAAAACCGACTGAGGGTCTTCCTGTCCCTCATGGAGACTGGCTGGTTTGATAACCTTCTCCTGGACATAGACAAAGCTGATGCCATTGTCAAGATGC
	TJP2	ENSG00000119139	CGGACACTGCAATTCCAAAT	GGAGCTGTCAGGTTGGCTC	GCTTGGGAGTCAGATCTTCGTAAAGGAAATGACCCGAACGGGTCTGGCAACTAAAGATGGCAACCTTCACGAAGGAGACATAATTCTCAAGATCAATGGGACTGTAACTGAGAACATGTCTTTAACGGATGCTCGAAAATTGATAGAAAAGTCAAGAGGAAAACTACAGCTAGTGGTGTTGAGAGACAGCCAGCAGACCCTCATCAACATCCCGTCATTAAATGACAGTGACTCAGAAATAGAAGATATTTCAGAAATAGAGTCAAACCGATCATTTTCTCCAGAGGAGAGACGTCATCAGTATTCTGATTATGATTATCATTCCTCAAGTGAGAAGCTGAAGGAAAGGCCAAGTTCCAGAGAGGACACGCCGAGCAGATTGTCCAGGATGGGTGCGAC…
	TERF1	ENSG00000147601	TGCTTTCAGTGGCTCTTCTG	ATGGAACCCAGCAACAAGAC	CCCTTGATGCACAGTTTGAAAATGATGAACGAATTACACCCTTGGAATCAGCCCTGATGATTTGGGGTTCAATTGAAAAGGAACATGACAAACTTCATGAAGAAATACAGAATTTAATTAAAATTCAGGCTATAGCTGTTTGTATGGAAAATGGCAACTTTAAAGAAGCAGAAGAAGTCTTTGAAAGAATATTTGGTGATCCAAATTCTCATATGCCTTTCAAAAGCAAATTGCTTATGATAATCTCTCAGAAAGATACATTTCATTCCTTTTTTCAACACTTCAGCTACAACCACATGATGGAGAAAATTAAGAGTTATGTGAATTATGTGCTAAGTGAAAAATCATCAACCTTTCTAATGAAGGCAGCGGCAAAAGTAGTAGAAAGCAAAAGGACAA…
	TERF2	ENSG00000132604	TTGTGGGGTCCTTGGACATA	CCAGTAGAAAACTGGTCAAGGAA	CCAGCCCTCAAAAACAAGAGACCCAGAAAAGATGAAAACGAAAGTTCAGCCCCGGCTGACGGTGAGGGTGGCTCGGAACTGCAGCCCAAGAACAAGCGCATGACAATAAGCAGATTGGTCTTGGAGGAGGACAGCCAGAGTACTGAGCCCAGCGCAGGCCTCAACTCCTCCCAGGAGGCCGCTTCAGCGCCACCATCCAAGCCCACCGTTCTCAACCAACCCCTCCCTGGAGAGAAGAATCCCAAAGTACCCAAAGGCAAGTGGAACAGCTCTAATGGGGTTGAAGAAAAGGAGACTTGGGTGGAAGAGGATGAACTGTTTCAAGTTCAGGCAGCACCAGATGAAGACAGTACAACCAATATAACAAAAAAGCAGAAGTGGACTGTAGAAGAAAGCGAG…
	USP39	ENSG00000168883	GCAGAGCATTCAGAAACCAA	TGAGATGCTTCAGGCAGTTG	TGCAAACTTGGACAAGCAAGCCAAATTGTCCCGGGCATATGATGGTACCACTTACCTGCCGGGTATTGTGGGACTGAATAACATAAAGGCCAATGATTATGCCAACGCTGTCCTTCAGGCTCTATCTAATGTTCCTCCTCTCCGGAACTACTTTCTGGAAGAAGACAATTATAAGAACATCAAACGTCCTCCAGGGGATATCATGTTCTTGTTGGTCCAGCGTTTTGGAGAGCTGATGAGAAAGCTCTGGAACCCTCGAAATTTCA
	ZNF691	ENSG00000164011	TCTTCCCACACTCACAGCAG	GCAAGAGCTTCAGCCAGAGT	AGGCAGATGAGAAGCCCTTTATATGTGCCCAGTGTGGCAAAACCTTCAATAATACCTCCAACCTGAGAACACACCAGCGGATCCACACTGGTGAGAAGCCTTACAAGTGTTCTGAATGTGGCAAGAGCTTCTCGAGAAGCTCCAACCGCATCCGGCACGAGCGGATCCACCTGGAAGAGAAACACTACAAATGCCCCAAGTGCCAGGAGAGCTTTCGGCGGCGCTCAGACCTCACCACGCACCAGCAAGATCACCTAGGCAAGCGGCCATACCGCTGTGACATCTGTGGCAAGAGCTTCAGCCAGAGTGCCACGCTAGCTGTGCATCACCGGACCCACCTGGAGCCAGCACCCTACATCTGCTGTGAGTGTGGGAAGAGCTTCAGCAACAGCTCCAGCTT
	GAPDH	ENSG00000111640	CAGCCTCAAGATCATCAGCA	TGTGGTCATGAGTCCTTCCA
Reverse transcription
	Primer	Sequence
	ß-actin	AGT CCG CCT AGA AGC ATT TG
	Telomeric	CCC TAA CCC TAA CCC TAA CCC TAA CCC TAA
telomeric qPCR
	Primer	qPCR forward primer (5' --> 3')	qPCR reverse primer (5' --> 3')
	ß-actin	TGT ACG CCA ACA CAG TGC TG	GCT GGA AGG TGG ACA GCG A
	1q-2q-10q-13q	GAA TCC TGC GCA CCG AGA T	CTG CAC TTG AAC CCT GCA ATA C
	15q	CAG CGA GAT TCT CCC AAG CTA AG	AAC CCT AAC CAC ATG AGC AAC G
